# Supplementary material for: Center Volumes Correlate with Likelihood of Stent Implantation in German Coronary Angiography
Source: Hindawi journal article supplement (doi:10.1155/2023/3723657), 2023-11-09

## Center volumes correlate with likelihood of stent implantation in German coronary angiography

Vera Oettinger, MD, M.Sc.; Philip Hehn; Christoph Bode, MD; Manfred Zehender, MD, PhD; Constantin von zur Mühlen, MD; Dirk Westermann, MD; Peter Stachon, MD; Klaus Kaier, PhD

### Supplementary Data S1: Multiple linear or logistic regression analyses and non-linear relationship of center volumes to all observed outcomes

#### Multiple linear or logistic regression analyses

|                                                                 | Number of Stents |              |                  | Stent rate (at least one stent) |              |                  | In-hospital mortality |              |                  | Length of stay |              |                   | Reimbursement |              |                    |  |
|-----------------------------------------------------------------|------------------|--------------|------------------|---------------------------------|--------------|------------------|-----------------------|--------------|------------------|----------------|--------------|-------------------|---------------|--------------|--------------------|--|
|                                                                 | Coeff            | p-value      | 95%CI            | OR                              | p-value      | 95%CI            | OR                    | p-value      | 95%CI            | Coeff          | p-value      | 95%CI             | Coeff         | p-value      | 95%CI              |  |
| <b>Hospital volume (linear relationship per 100 procedures)</b> | <b>0.01</b>      | <b>0.020</b> | <b>0.00 0.02</b> | <b>1.02</b>                     | <b>0.003</b> | <b>1.01 1.03</b> | <b>1.01</b>           | <b>0.105</b> | <b>1.00 1.01</b> | <b>-0.01</b>   | <b>0.201</b> | <b>-0.03 0.01</b> | <b>58 €</b>   | <b>0.108</b> | <b>-13 € 128 €</b> |  |
| <b>Logistic EuroSCORE</b>                                       | -0.01            | 0.000        | -0.02 -0.01      | 0.97                            | 0.000        | 0.97 0.97        | 1.02                  | 0.000        | 1.02 1.02        | 0.24           | 0.000        | 0.23 0.25         | 151 €         | 0.000        | 134 € 167 €        |  |
| <b>Age in 10 years</b>                                          | 0.03             | 0.000        | 0.02 0.03        | 1.03                            | 0.000        | 1.01 1.04        | 1.40                  | 0.000        | 1.37 1.44        | -0.08          | 0.002        | -0.13 -0.03       | -181 €        | 0.000        | -25 € -12 €        |  |
| <b>Female</b>                                                   | 0.02             | 0.000        | 0.01 0.03        | 1.05                            | 0.000        | 1.03 1.07        | 0.96                  | 0.034        | 0.92 1.00        | -0.19          | 0.000        | -0.25 -0.12       | -544 €        | 0.000        | -6,181 € -4,699 €  |  |
| <b>1-vessel CAD</b>                                             | -0.23            | 0.000        | -0.28 -0.18      | 0.80                            | 0.000        | 0.73 0.88        | 0.65                  | 0.000        | 0.52 0.82        | 3.02           | 0.000        | 2.50 3.54         | 2,820 €       | 0.000        | 2,149 € 3,490 €    |  |
| <b>2-vessel CAD</b>                                             | 0.10             | 0.000        | 0.05 0.15        | 1.28                            | 0.000        | 1.16 1.41        | 0.73                  | 0.005        | 0.59 0.91        | 2.90           | 0.000        | 2.38 3.42         | 2,873 €       | 0.000        | 2,206 € 3,540 €    |  |
| <b>3-vessel CAD</b>                                             | 0.19             | 0.000        | 0.14 0.24        | 1.08                            | 0.112        | 0.98 1.19        | 1.07                  | 0.547        | 0.86 1.33        | 3.20           | 0.000        | 2.68 3.73         | 3,206 €       | 0.000        | 2,529 € 3,883 €    |  |
| <b>Left main stenosis</b>                                       | -0.11            | 0.000        | -0.16 -0.07      | 0.59                            | 0.000        | 0.55 0.63        | 1.67                  | 0.000        | 1.57 1.77        | 1.49           | 0.000        | 1.24 1.74         | 1,609 €       | 0.000        | 1,265 € 1,954 €    |  |
| <b>Stable AP</b>                                                | -0.04            | 0.216        | -0.11 0.02       | 0.96                            | 0.494        | 0.84 1.09        | 0.29                  | 0.000        | 0.20 0.42        | -1.01          | 0.000        | -1.33 -0.69       | -1,238 €      | 0.000        | -1,512 € -965 €    |  |
| <b>Unstable AP</b>                                              | 0.16             | 0.000        | 0.13 0.19        | 1.54                            | 0.000        | 1.46 1.63        | 0.39                  | 0.000        | 0.35 0.43        | -1.10          | 0.000        | -1.23 -0.96       | -1,137 €      | 0.000        | -1,276 € -998 €    |  |
| <b>NSTEMI</b>                                                   | 0.54             | 0.000        | 0.52 0.56        | 3.07                            | 0.000        | 2.95 3.20        | 2.60                  | 0.000        | 2.44 2.77        | 1.93           | 0.000        | 1.79 2.07         | 2,279 €       | 0.000        | 2,144 € 2,414 €    |  |
| <b>STEMI</b>                                                    | 0.98             | 0.000        | 0.95 1.00        | 10.01                           | 0.000        | 9.52 10.54       | 8.47                  | 0.000        | 7.93 9.04        | 2.01           | 0.000        | 1.86 2.17         | 3,183 €       | 0.000        | 3,006 € 3,361 €    |  |
| <b>In-stent stenosis</b>                                        | -0.03            | 0.090        | -0.06 0.00       | 1.06                            | 0.059        | 1.00 1.12        | 0.88                  | 0.007        | 0.81 0.97        | -0.60          | 0.000        | -0.75 -0.45       | -346 €        | 0.000        | -524 € -168 €      |  |
| <b>Emergency admission</b>                                      | -0.03            | 0.007        | -0.06 -0.01      | 0.91                            | 0.000        | 0.87 0.95        | 1.43                  | 0.000        | 1.33 1.54        | 1.04           | 0.000        | 0.84 1.23         | -305 €        | 0.015        | -552 € -58 €       |  |

#### Non-linear relationship

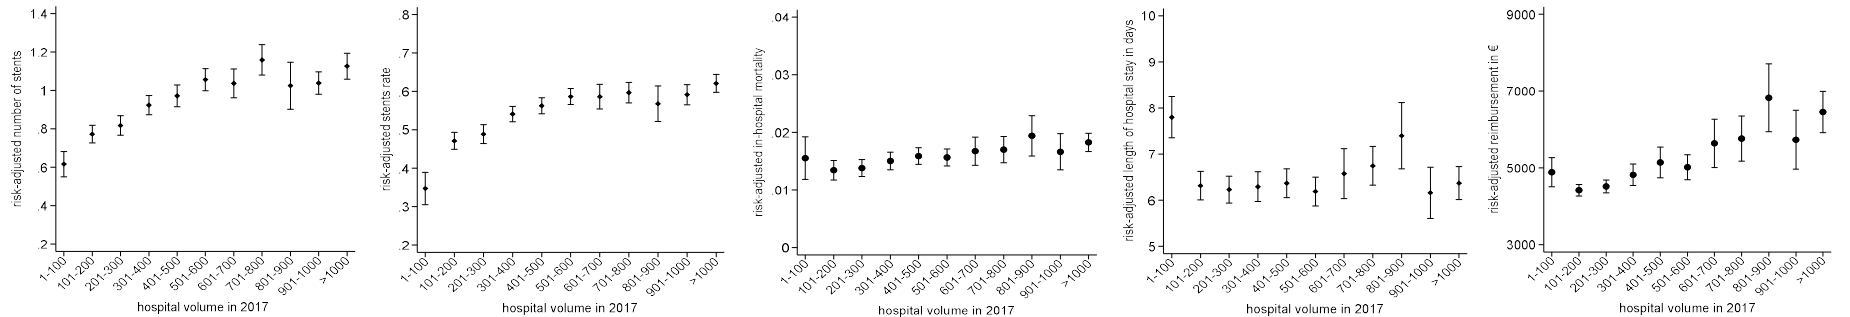

Supplement: f1 [file 3723657.f1.pdf]
